# Supplementary material for: Retrospective evaluation of clinical use of cis-atracurium in horses
Source: PLoS One. 2019 Aug 15;14(8):e0221196. doi: 10.1371/journal.pone.0221196 (PMC6695120; doi:10.1371/journal.pone.0221196)
Supplement: S1 Table — (XLSX) [file pone.0221196.s001.xlsx]

## Sheet: Sheet1
ID	case number	date of surgery	Species	Breed	Age (months)	Weight (kg)	Sex	A.S.A. status	Pre-existing conditions	Surgical procedure	Preanaesthetic medication	Induction of anaesthesia	Antibiotics	Inhalational maintenance	TIVA/TCI	Arterial line (y/n)	Central line (y/n)	Monitoring used	Intraoperative injectable analgesia	Locoregional techniques	NMB (Cis-atracurium)	IPPV (y/n)	Fluid therapy	Vasopressors/Inotropes	Duration of anaesthesia (min)	Duration of surgery (min)	Postoperative analgesia	Postoperative care	RECOVERY (good recovery 1/5)	Complications and comments	ELECTRODE PLACEMENT	CISATRACURIUM INDUCTION DOSE (µg/kg)	Onset of action (from injection to twitch decreased under 3) (min)	CISATRACURIUM SUPLIMENTARY DOSES DOSE (µg/kg)	NMB duration after the first bolus (time wile TOF is kept under 3) (min)	the total dose of CIS-A administered (µg/kg)	Total duration of the NMB (TOF count<3) (min)	NMB antidote neostigmine (µg/kg)	Atropine (µg/kg)	Recovery time (from injection to TOF rate >90%) (min)	Side effects of Cis-atracurium	Heart rate 5 minutes befor first bolus of cis-atracurium	Heart rate 5 minutes after the first bolus of cis-atracurium	Arterial blood pressure 5 minutes before the first bolus of cis-atracurium	Arterial blood pressure 5 minutes after the first bolus of cis-atracurium
10061886	4119604	2016-08-22	Horse	American Paint Horse	264	430	Female	2	Palpebral granuloma	Mass excision	Flunixin meglumine (473 mg IV); Acepromazine (22 mg IM); Xylazine (258 mg IV)	Midazolam (26 mg IV); Ketamine (950 mg IV)	Penicillin Na; gentamicin	Isoflurane	No	Yes	Yes	ECG, SpO², Invasive blood pressure, EtCO², EtAA, FiO², blood gas, spirometry, Train-of-four	No	No	Yes	Yes	Ringer's Lactate	No	115	60	Flunixin meglumine	Watch for signs of pain. Keep it calm	1/5	No	Superficial peroneal nerve	50	TOF rate remained over 25%. 50 µg/kg dose failed to produce NMB	1*50	0	100	24	15	15	Not aplicable if a second bolus	the first dose failed to produce NMB	45	40	90	75
10056621	4108267	2015-10-16	Horse	Throughbred	102	480	Female	2	Panuveitis	Enucleation	Flunixin meglumine (528 mg IV); Acepromazine (48 mg IM); Xylazine (288 mg IV)	Midazolam (28,5 mg IV); Ketamine (1,1 g IV)	Penicillin Na; gentamicin	Isoflurane	No	Yes	Yes	ECG, SpO², Invasive blood pressure, EtCO², EtAA, FiO², blood gas, spirometry, Train-of-four	Ketamine, morphine	Retrobulbar nerve block	Yes	Yes	Ringer's Lactate	Dobutamine	140	85	Flunixin meglumine	No	2/5	Mild hipotension	Superficial peroneal nerve	50	8	1*25	7	75	27	15	15	Not aplicable if a second bolus	No	34	33	62	56
10056344	4107698	2015-09-30	Horse	Mixed breed	240	678	Male neutered	3	mass on the eyelid	mass resection	Flunixin meglumine (746 mg IV); Acepromazine (68 mg IM); Xylazine (400 mg IV);	Midazolam (40 mg IV); Ketamine (1.5 g IV)	Penicillin Na; gentamicin	Isoflurane	No	Yes	Yes	ECG, SpO², Invasive blood pressure, EtCO², EtAA, FiO², blood gas, spirometry, Train-of-four	Morphine; Xylazine CRI (300 mg/h)	Supraorbitar n; Lacrimal n; Zygomatic n; Maxilopalp n	Yes	Yes	Ringer's Lactate	Dobutamine	175	100	Flunixin meglumine	Watch for signs of pain. Keep it calm	1/5	Mild hipotension	Superficial peroneal nerve	50	TOF COUNT remained over 3. 50 µg/kg dose failed to produce NMB	1*25	0	75	17	N		Not aplicable if a second bolus	the first dose failed to produce NMB	62	68	60	58
10060468	4124145	2016-12-13	Horse	Paint	72	490	Male	2	Corneal ulcer	subconjunctival implant	Flunixin meglumine (540 mg IV); Acepromazine (49 mg IM); Xylazine (300 mg IV)	Midazolam (300 mg IV); Ketamine (1.1 g IV)	Penicillin procain; gentamicin	Isoflurane	No	No	Yes	ECG, SpO², Noninvasive blood pressure (oscilometry), EtCO², EtAA, FiO², blood gas, Train-of-four	Ketamine	No	Yes	Yes	Ringer's Lactate	Dobutamine	105	65	Flunixin meglumine	Watch for signs of pain. Keep it calm	1/5	Unable to place an arterial catheter and to measure blood pressure	Superficial peroneal nerve	50	3	1*25	16	75	28	N		Not aplicable if a second bolus	No	30	30	70	70
10062280	4119533	2016-08-14	Horse	Selle Français	60	572	Female	2	Corneal perforation	Corneal suture and conjunctival graft	Flunixin meglumine (575 mg IV); Acepromazine (17,2 mg IV); Xylazine (340 mg IV)	Midazolam (34 mg IV); Ketamine (1.3 g IV)	Penicillin Na; gentamicin	Isoflurane	No	Yes	Yes	ECG, SpO², Invasive blood pressure, EtCO², EtAA, FiO², blood gas, spirometry, Train-of-four	Ketamine	auriculo-palpebral nerve block	Yes	Yes	Ringer's Lactate	No	170	125	Flunixin meglumine	Watch for signs of pain. Keep it calm	2/5	No	Superficial peroneal nerve	50	4	1*50	23	100	124	15	N	Not aplicable if a second bolus	No	42	45	75	70
10055702	4106394	2015-08-21	Horse	Warmblood	156	535	Female	2	Corneal ulcer	Conjunctival graft	Flunixin meglumine (589 mg IV); Acepromazine (53,5 mg IV); Xylazine (321 mg IV)	Midazolam (32,1 mg IV); Ketamine (1,2 g IV)	Penicillin Na; gentamicin	Isoflurane	No	Yes	Yes	ECG, SpO², Invasive blood pressure, EtCO², EtAA, FiO², blood gas, spirometry, Train-of-four	morphine, Xylazine CRI	auriculo-palpebral nerve block	Yes	Yes	Ringer's Lactate	Dobutamine	165	100	Flunixin meglumine	No	1/5	No	Superficial peroneal nerve	50	5	1*50; 1*15	10	115	52	15	15	Not aplicable if a second bolus	No	69	58	57	68
10055315	4105617	2015-07-29	Horse	Mixed breed	246	112	Male	2	Corneal ulcer	Conjunctival Graft	Flunixin meglumine (123 mg IV); Acepromazine (11,2 mg IM); Xylazine (67,2 mg IV)	Midazolam (6,7 mg IV); Ketamine (246 mg IV)	Penicillin procain; gentamicin	Y	No	Yes	Yes	ECG, SpO², Invasive blood pressure, EtCO², EtAA, FiO², blood gas, spirometry, Train-of-four	Ketamine, morphine	auriculo-palpebral nerve block	Yes	Yes	Ringer's Lactate	Dobutamine	155	110	Flunixin meglumine	No	3/5	Mild hipotension	Superficial peroneal nerve	50	7	2*25	15	100	66	15	15	Not aplicable if a second bolus	No	47	60	62	57
10063471	4121939	2016-10-27	Horse	SBS	168	390	Female	2	Corneal ulcer	Conjunctival graft	Flunixin meglumine (400 mg IV); Acepromazine (39 mg IM); Xylazine (240 mg IV); Butorphanol (10 mg IV)	Midazolam (25 mg IV); Ketamine (900 mg IV)	Penicillin Na; Gentamicin	Isoflurane	No	Yes	Yes	ECG, SpO², Invasive blood pressure, EtCO², EtAA, FiO², blood gas, spirometry, Train-of-four	Ketamine; Butorphanol; Xylazine	No	Yes	Yes	Ringer's Lactate	No	120	90	Flunixin meglumine	Watch for signs of pain. Keep it calm	1/5	Hyperexcitation during perioperative periodpainful procedure	Superficial peroneal nerve	50	TOF rate remained over 25%. 50 µg/kg dose failed to produce NMB	2*25	0	100	34	N		Not aplicable if a second bolus	the first dose failed to produce NMB	35	35	80	80
10026925	4104126	2015-06-13	Horse	Mixed breed	221	480	Female	2	Corneal ulcer	Conjunctival graft	Flunixin meglumine (528 mg IV); Acepromazine (48 mg IM); Xylazine (288 mg IV)	Midazolam (28,8 mg IV); Ketamine (1,1 g IV)	Penicillin procain; gentamicin	Isoflurane	No	Yes	Yes	ECG, SpO², Invasive blood pressure, EtCO², EtAA, FiO², blood gas, spirometry, Train-of-four	Ketamine, morphine, Xylazine	No	Yes	Yes	Ringer's Lactate	Dobutamine	200	130	Flunixin meglumine	No	1/5	No	Superficial peroneal nerve	50	5	3*25; 1*12.5	6	137.5	58	15	15	Not aplicable if a second bolus	No	37	45	66	75
10055753	411303	2016-01-07	Horse	Selle Français	188	648	Male neutered	2	Uveitis	Cyclosporine implant	Acepromazine (64,8 mg IM); Flunixin meglumine (713 mg IV); Xylazine (389 mg IV)	Midazolam (38,9 mg IV); Ketamine (1,43 mg IV)	Penicillin procain; gentamicin	Isoflurane	No	Yes	Yes	ECG, SpO², Invasive blood pressure, EtCO², EtAA, FiO², blood gas, spirometry, Train-of-four	Ketamine, Xylazine	No	Yes	Yes	Ringer's Lactate	Dobutamine	95	52	Flunixin meglumine	atropine	2/5	No	Superficial peroneal nerve	50	4	No	16	50	16	15	15	44	No	32	32	66	68
10060489	4115882	2016-05-12	Horse	Dutch Warmblood	107	550	Male neutered	2	Foreign body in the left eye	Foreign body extraction & Conjunctival Graft	Flunixin meglumine (605 mg IV); Acepromazine (55 mg IM); Xylazine (330 mg IV)	Midazolam (33 mg IV); Ketamine (1,2 g IV)	Penicillin Na; gentamicin	Isoflurane	No	Yes	Yes	ECG, SpO², Invasive blood pressure, EtCO², EtAA, FiO², blood gas, spirometry, Train-of-four	Xylazine CRI; Ketamine	No	Yes	Yes	Ringer's Lactate	Dobutamine	140	60	Flunixin meglumine	Washing system under lid	1/5	No	Superficial peroneal nerve	50	3	No	17	50	17	N		39	No	27	27	87	86
10064000	4130867	2017-05-31	Horse	Hanoverian	156	609	Female	2	immunitary keratitis	Ciclosporine implant	Flunixin meglumine (600 mg IV); Acepromazine (61 mg IM); Xylazine (360 mg IV)	Midazolam (35 mg IV); Ketamine (1.3 g IV)	Penicillin Na; Gentamicin	Isoflurane	No	Yes	Yes	ECG, SpO², Invasive blood pressure, EtCO², EtAA, FiO², blood gas, spirometry, Train-of-four	Morphine; Ketamine	palpebral & frontal nerve block;	Yes	Yes	Ringer's Lactate	Dobutamine	125	60	Flunixin meglumine	Watch for signs of pain. Keep it calm	1/5	No	Superficial peroneal nerve	50	5	1*25	17	75	38	15	15	Not aplicable if a second bolus	No	33	33	65	75
10046446	4115978	2016-05-12	Horse	Haflinger	166	486	Male neutered	2	Conjunctival mass	Conjunctival mass excision	Flunixin meglumine (534,6 mg IV); Acepromazine (48,6 mg IM); Romifidine(19,4 mg IV)	Midazolam (29,2 mg IV); Ketamine (1,1 mg IV)	Penicillin Na; gentamicin	Isoflurane	No	Yes	Yes	ECG, SpO², Invasive blood pressure, EtCO², EtAA, FiO², blood gas, spirometry, Train-of-four	RomifidineCRI	Lacrimal nerve block; zygomatic nerve block	Yes	Yes	Ringer's Lactate	Dobutamine	55	55	Flunixin meglumine	No	1/5	No	Superficial peroneal nerve	75	10	No	22	75	22	15	15	60	No	39	38	49	56
10061890	4119819	2016-08-22	Horse	Haflinger	84	482	Female	2	Corneal carcinoma	Keratotomy & Conjunctival graft	Flunixin meglumine (530 mg IV); Acepromazine (48 mg IM); Xylazine (289 mg IV)	Midazolam (28,5 mg IV); Ketamine (1 g IV)	Penicillin Na; gentamicin	Isoflurane	No	Yes	Yes	ECG, SpO², Invasive blood pressure, EtCO², EtAA, FiO², blood gas, spirometry, Train-of-four	No	Auricular-palpebral block: Lidocaine (30 mg)	Yes	Yes	Ringer's Lactate	Dobutamine	140	80	Flunixin meglumine	Watch for signs of pain. Keep it calm	1/5	Neostigmine recovery. Light hypotension during anaesthesia	Superficial peroneal nerve	75	2	No	40	80	40	15	15	60	No	40	40	85	85
10056753	4108510	2015-10-22	Horse	Paint	22	275	Female	2	Corneal ulcer	Conjunctival Graft	Flunixin meglumine 302,5 mg IV); Xylazine (165 mg IV)	Midazolam (16,5 mg IV); Ketamine (605 mg IV)	Penicillin procain; gentamicin	Isoflurane	No	Yes	Yes	ECG, SpO², Invasive blood pressure, EtCO², EtAA, FiO², blood gas, spirometry, Train-of-four	No	No	Yes	Yes	Ringer's Lactate	No	145	92	No	No	1/5	No	Superficial peroneal nerve	75	5	No	25	75	25	15	15	73	No	37	26	74	91
10052537	4100068	2014-03-03	Horse	Haflinger	144	470	Male neutered	2	Epithelioma	Conjunctival graft	Flunixin meglumine (517 mg IV); Xylazine (282 mg IV)	Midazolam (28 mg IV); Ketamine (1,03 mg IV)	Penicillin procain; gentamicin	Isoflurane	No	Yes	Yes	ECG, SpO², Invasive blood pressure, EtCO², EtAA, FiO², blood gas, spirometry, Train-of-four	No	No	Yes	Yes	Ringer's Lactate	Dobutamine	95	70	Flunixin meglumine	Watch for signs of pain. Keep it calm	1/5	No	Superficial peroneal nerve	100	3	1*50	29	150	55	N		Not aplicable if a second bolus	No	46	43	104	93
10052636	4100250	2015-03-02	Horse	American Quarter Horse	24	403	Female	2	Septic tenosynovitis of the sheath of the extensor radio-carpial	Tenoscopy	Flunixin meglumine (443,3 mg IV); Acepromazine (40,3 mg IV); Xylazine (242 mg IV)	Midazolam (24,2 mg IV); Ketamine (887 mg IV)	Cobactan	Isoflurane	No	No	Yes	ECG, SpO², Noninvasive blood pressure (oscilometry), EtCO², EtAA, FiO², blood gas, Train-of-four	morphine	No	Yes	Yes	Ringer's Lactate	Dobutamine	165	100	Flunixin meglumine	No	1/5	No	Superficial peroneal nerve	100	2	2* 50	33	200	109	15	N	Not aplicable if a second bolus	No	38	49	62	104
10057753	4110570	2015-12-18	Horse	Mixed breed	264	450	Female	2	fracture of the left proximal humerus	fracture repair	Flunixin meglumine (500 mg IV); Acepromazine (45 mg IM); Xylazine (270 mg IV)	Midazolam (27 mg IV); Ketamine (100 mg IV)	Penicillin Na	Isoflurane	No	No	Yes	ECG, SpO², Noninvasive blood pressure (oscilometry), EtCO², EtAA, FiO², blood gas, Train-of-four	Morphine; Ketamine	No	Yes	Yes	Ringer's Lactate	Dobutamine	240	160	Flunixin meglumine	Watch for signs of pain. Keep it calm. Supportive bandage	2/5	Unable to place an arterial catheter and to measure blood pressure	Superficial peroneal nerve	100	5	2*50	30	200	98	15	15	Not aplicable if a second bolus	No	41	40	72	75
10051641	4101099	2015-03-26	Horse	Belgian Sport Horse	89	530	Male neutered	2	Immune mediated keratitis	Cyclosporine implant	Flunixin meglumine (583 mg IV); Acepromazine (53 mg IM); Xylazine (318 mg IV)	Midazolam (31,8 mg IV); Ketamine (1,2 g IV)	Penicillin procain; gentamicin	Isoflurane	No	Yes	Yes	ECG, SpO², Invasive blood pressure, EtCO², EtAA, FiO², blood gas, spirometry, Train-of-four	Ketamine	No	Yes	Yes	Ringer's Lactate	No	110	35	Flunixin meglumine	No	1/5	No	Superficial peroneal nerve	100	5	No	44	100	44	15	15	65	No	56	35	81	82
10053609	4102091	2015-04-22	Horse	Mixed breed	123	480	Male neutered	2	Uveitis	Enucleation	Flunixin meglumine (528 mg IV); Acepromazine (48 mg IM); Xylazine (288 mg IV)	Midazolam (28,8 mg IV); Ketamine (1,1 g IV)	Penicillin procain; gentamicin	Isoflurane	No	Yes	Yes	ECG, SpO², Invasive blood pressure, EtCO², EtAA, FiO², blood gas, spirometry, Train-of-four	No	Palpebral & frontal nerve block; retrobulbar nerve block	Yes	Yes	Ringer's Lactate	Dobutamine	95	60	Flunixin meglumine	No	1/5	No	Superficial peroneal nerve	100	4	No	35	100	35	15	15	69	No	41	45	90	116
10063563	4123072	2016-11-16	Horse	Trotter	108	579	Female	2	Corneal ulcer	Conjunctival graft	Flunixin meglumine (650 mg IV); Acepromazine (58 mg IV); Xylazine (340 mg IV)	Midazolam (35 mg IV); Ketamine (1.3 g IV)	Penicillin Na; Gentamicin	Isoflurane	No	Yes	Yes	ECG, SpO², Invasive blood pressure, EtCO², EtAA, FiO², blood gas, spirometry, Train-of-four	Ketamine	No	Yes	Yes	Ringer's Lactate	Dobutamine	205	70	Flunixin meglumine	Watch for signs of pain. Keep it calm	2/5	No	Superficial peroneal nerve	100	6	No	32	100	32	N		57	No	30	35	80	85
10067341	4129701	2017-05-09	Horse	Hanoverian	252	708	Male neutered	2	Corneal ulcer	Keratotomy & Conjunctival graft	Flunixin meglumine (780 mg IV); Acepromazine (71 mg IM); Xylazine (420 mg IV)	Midazolam (42 mg IV); Ketamine (1,56 g)	Penicillin procain; gentamicin	Isoflurane	No	Yes	Yes	ECG, SpO², Invasive blood pressure, EtCO², EtAA, FiO², blood gas, spirometry, Train-of-four	Morphine	No	Yes	Yes	Ringer's Lactate	Dobutamine	85	65	Flunixin meglumine	Watch for signs of pain. Keep it calm	1/5	No	Superficial peroneal nerve	100	2	No	28	100	28	N		53	No	37	40	75	65
10052529	4100052	2015-03-06	Horse	Selle Français	119	600	Male neutered	2	Uveitis	Enucleation	Flunixin meglumine (660 mg IV); Acepromazine (60 mg IM); Xylazine (360 mg IV)	Midazolam (36 mg IV); Ketamine (1,32 mg IV)	Penicillin procain; gentamicin	Isoflurane	No	Yes	Yes	ECG, SpO², Invasive blood pressure, EtCO², EtAA, FiO², blood gas, spirometry, Train-of-four	Ketamine	Palpebral & frontal nerve block; retrobulbar nerve block	Yes	Yes	Ringer's Lactate	Dobutamine	115	65	Flunixin meglumine	No	1/5	No	Superficial peroneal nerve	100	2	No	35	100	35	N		44	No	28	31	80	91
																																										The t-value is -0.02803. The p-value is .488885. The result is not significant at p < .05.		The t-value is -0.92645. The p-value is .179632. The result is not significant at p < .05.
